# Supplementary material for: Gene expression profiling of 1200 pancreatic ductal adenocarcinoma reveals novel subtypes
Source: PubMed Central journal article supplement (PMC5975421; doi:10.1186/s12885-018-4546-8), 2018-05-29

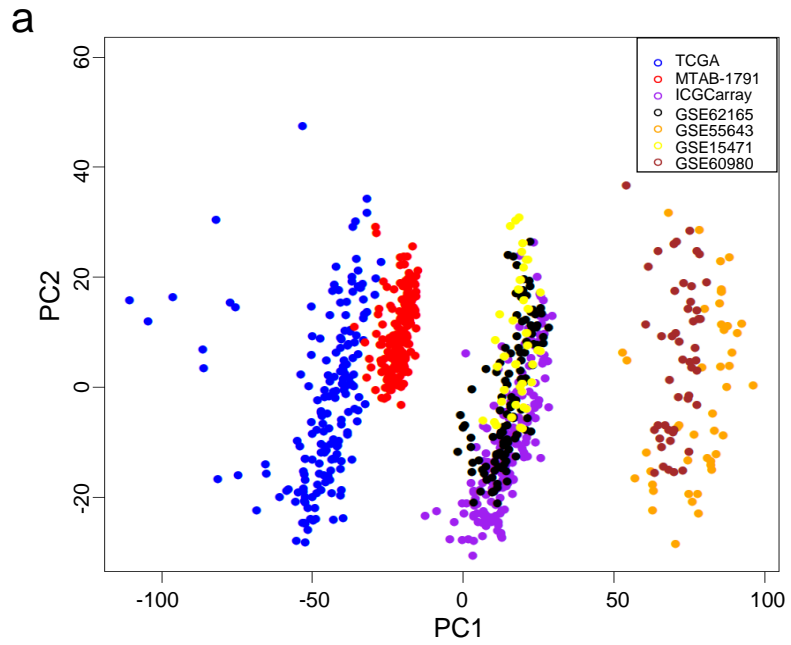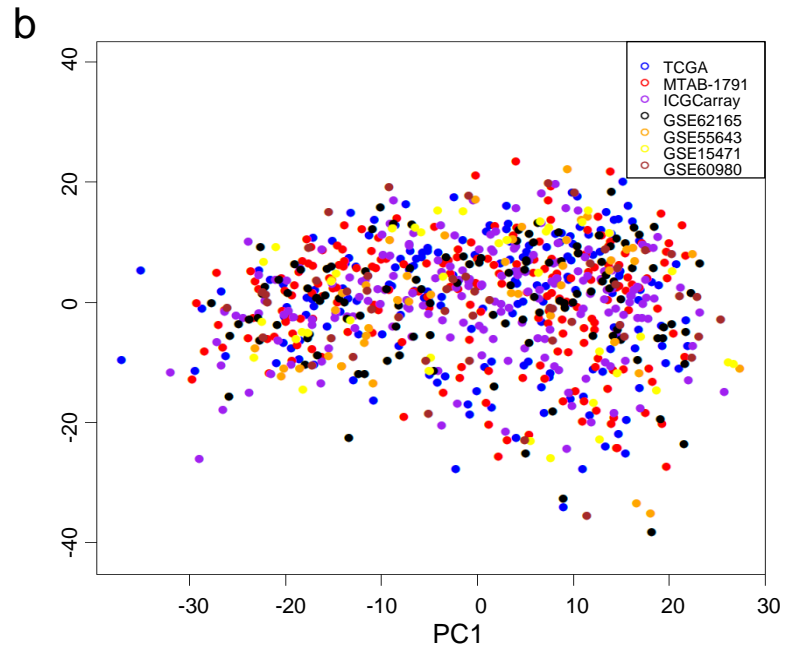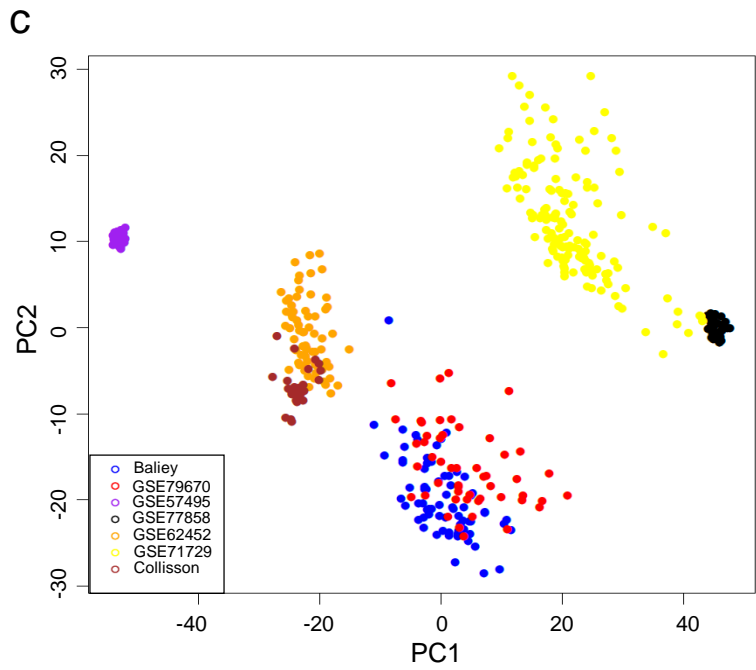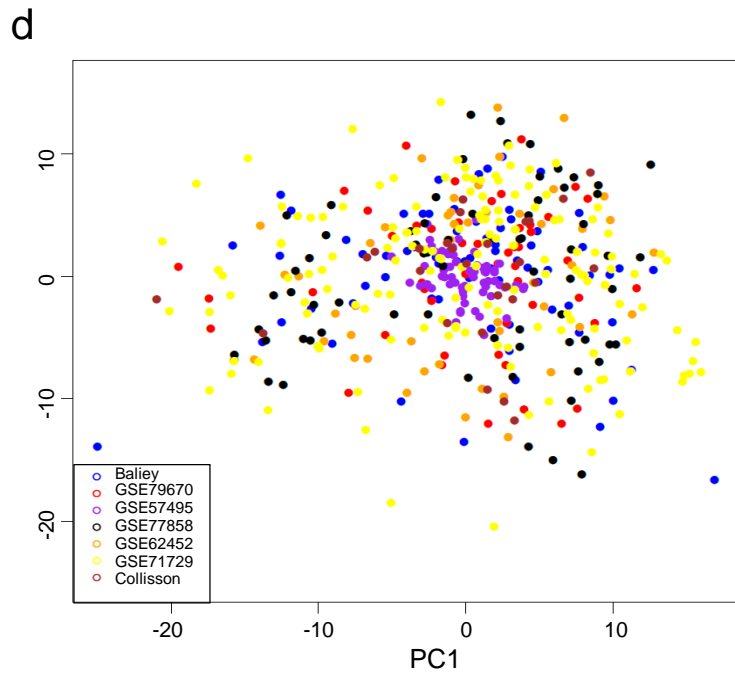

Supplement: 12885_2018_4546_MOESM1_ESM.pdf [file 12885_2018_4546_MOESM1_ESM.pdf]
